# Supplementary material for: Pterostilbene alleviated cerebral ischemia/reperfusion-induced blood–brain barrier dysfunction via inhibiting early endothelial cytoskeleton reorganization and late basement membrane degradation
Source: Royal Society of Chemistry journal article supplement (doi:10.1039/d3fo02639f), 2023-01-01

# Supplementary material for Western Blotting

It should be noted that the markers we used (Multicolor Protein Marker, Cowing Biotechnology, Cat NO. CW2841S) could not be developed by eECL western blot kit (Cowing Biotechnology, Cat NO. CW0049S) . Therefore, these markers can only be identified by the human eye and cannot be taken by the ChemiDoc XRS+ imaging system and displayed in the obtained images.

**Figure 8b**

**$\beta$ -Actin**

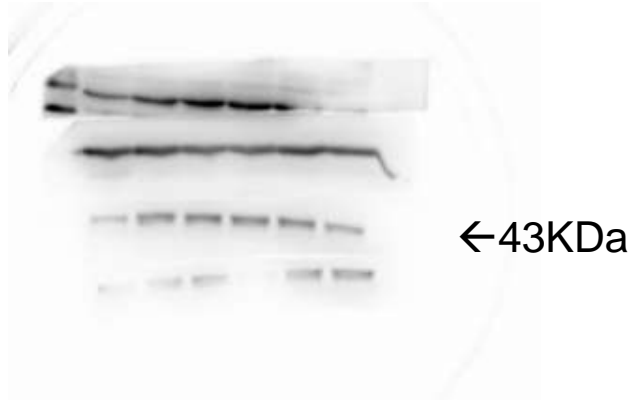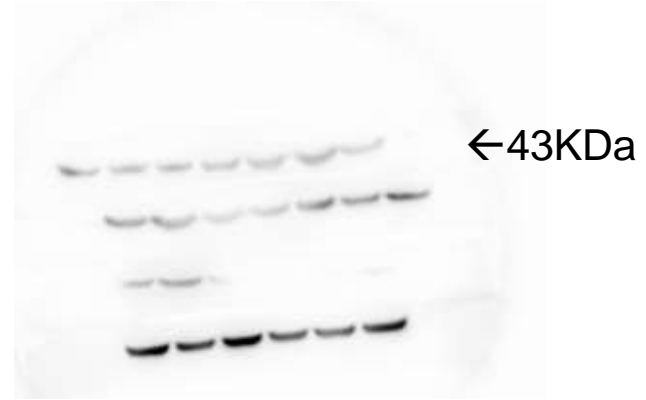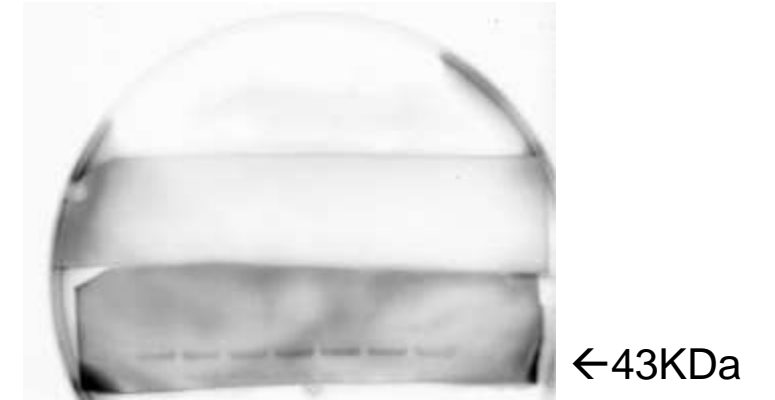

**F-Actin**

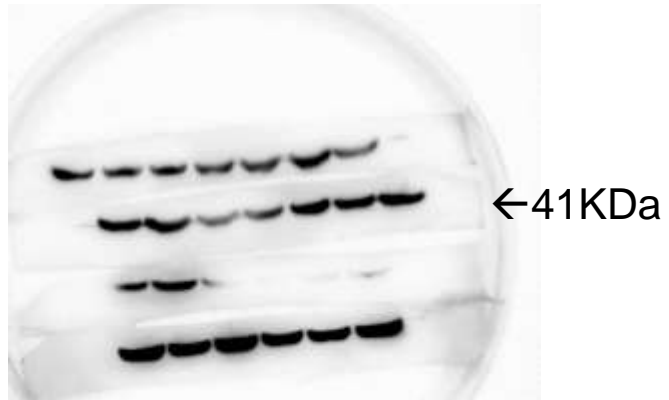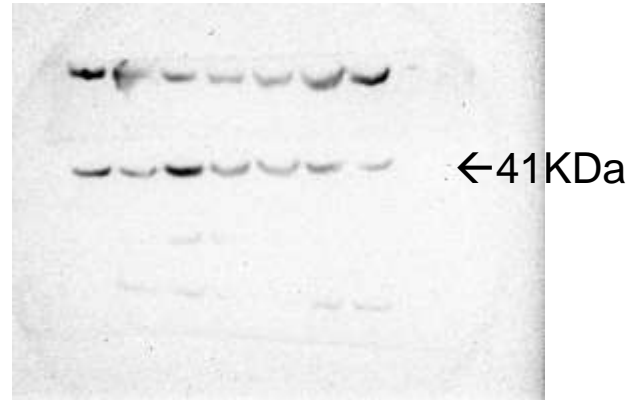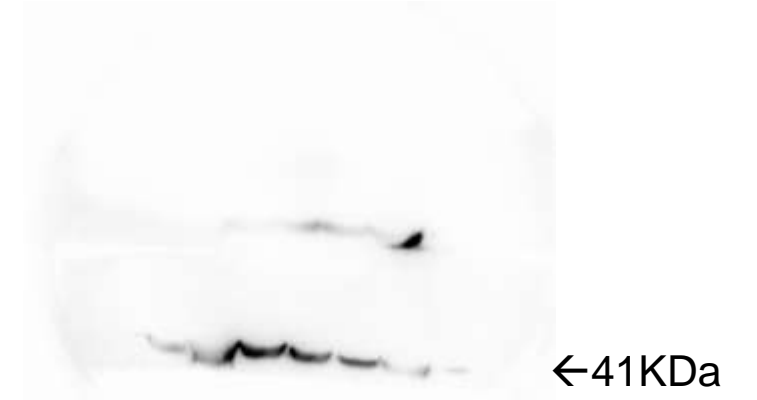

**G-Actin**

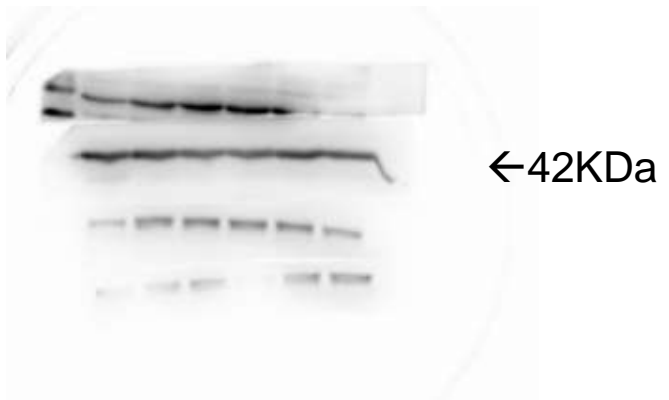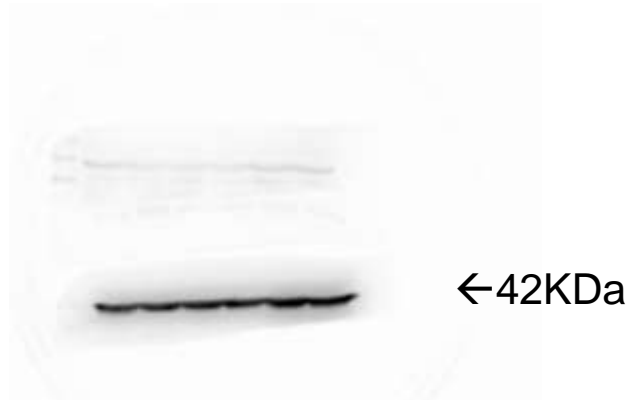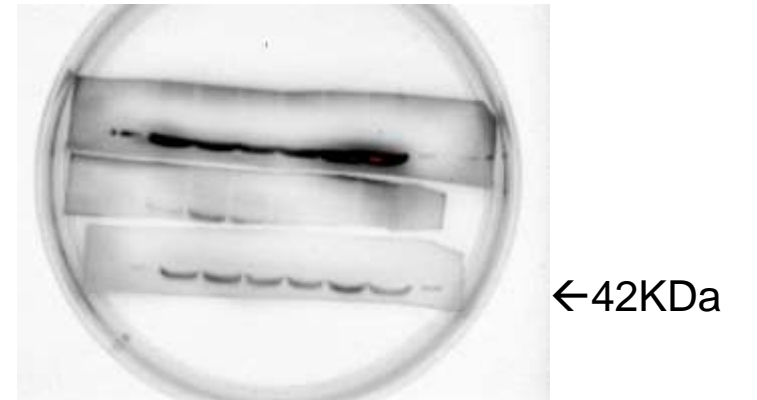

**Figure 8d**

**tADF**

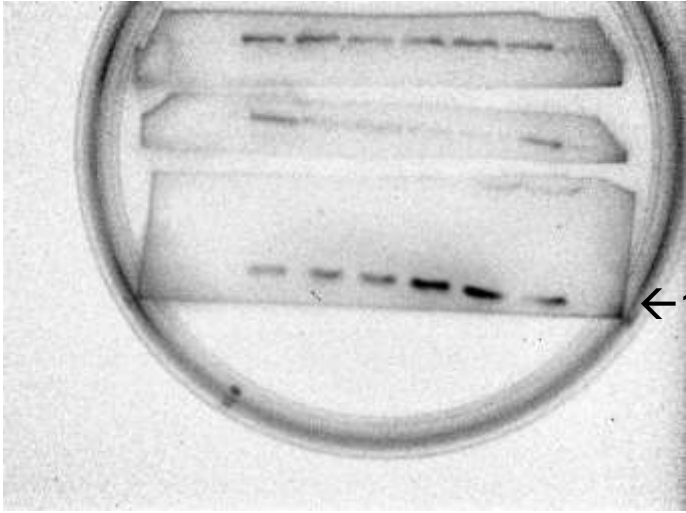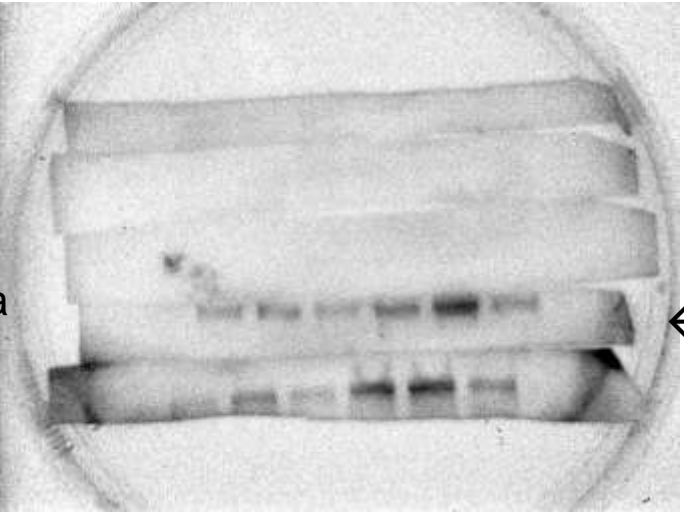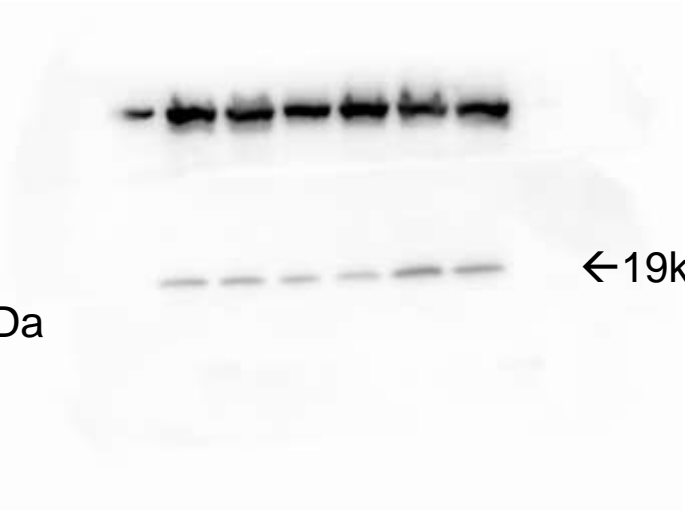

**pADF**

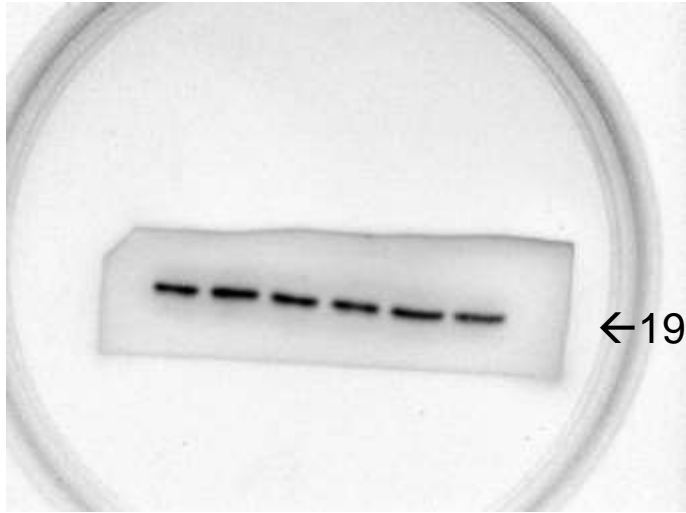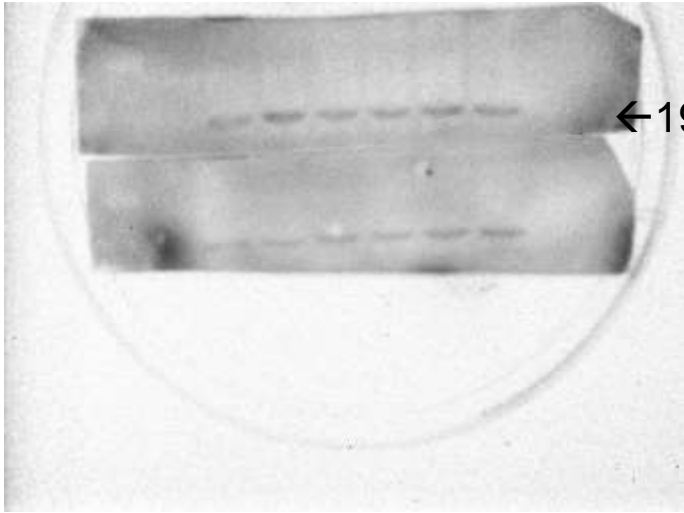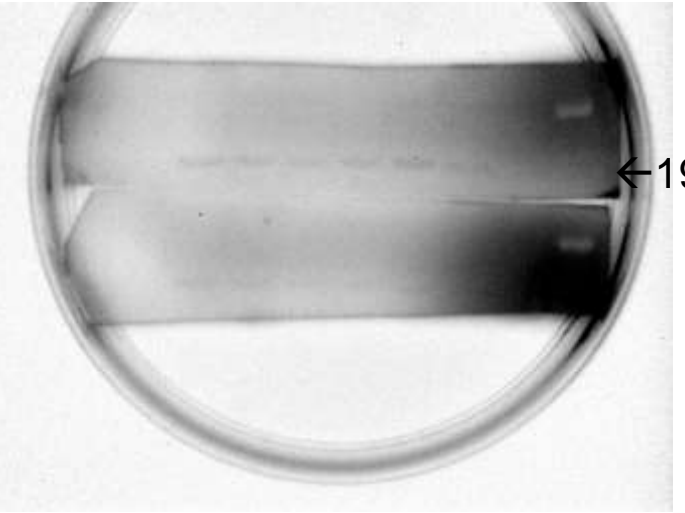

**ROCK**

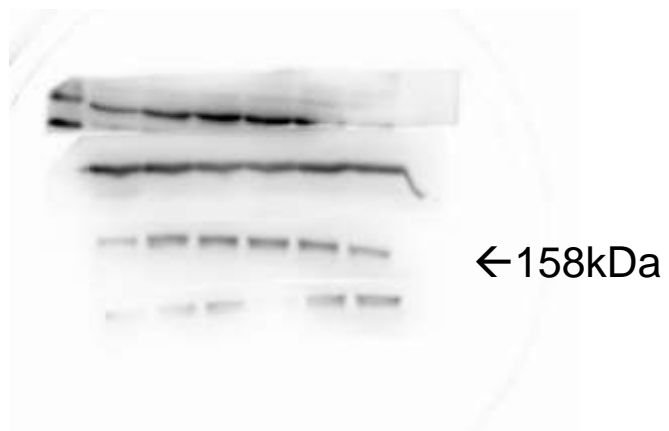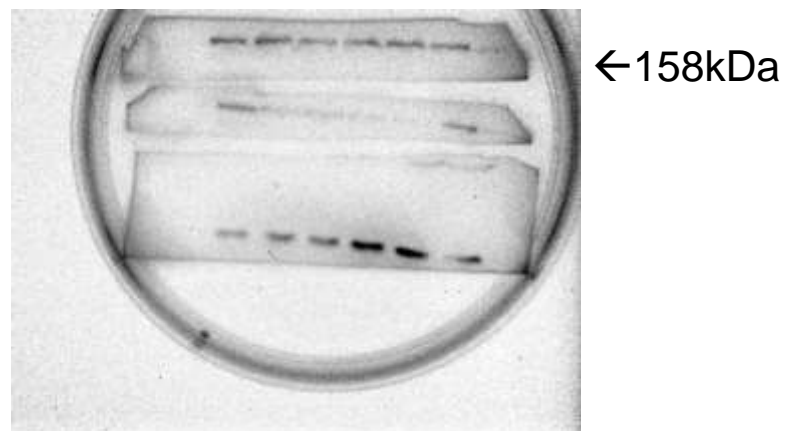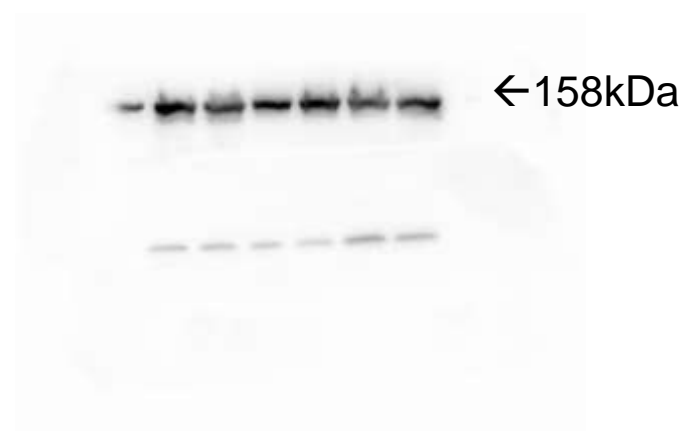

**pMLC**

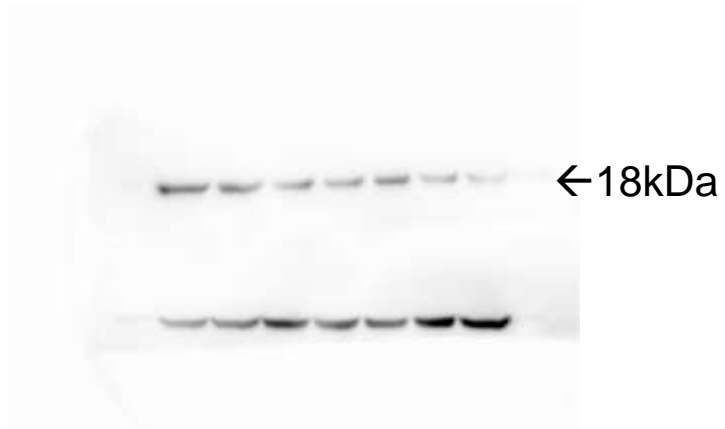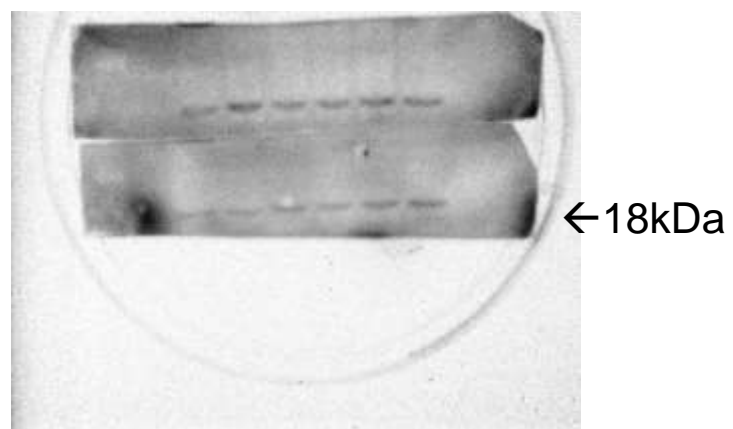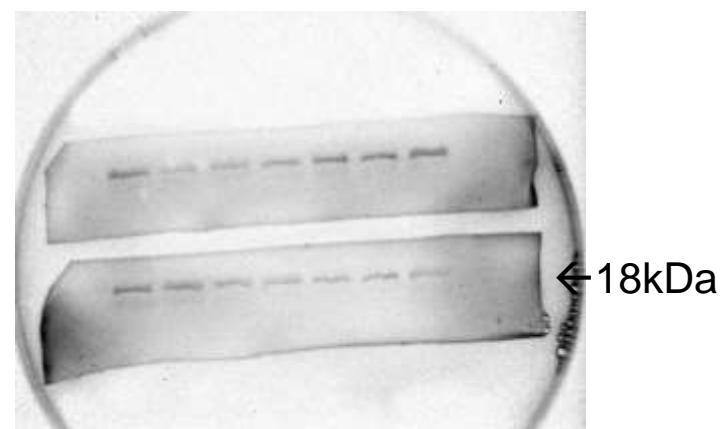

**$\beta$ -Actin**

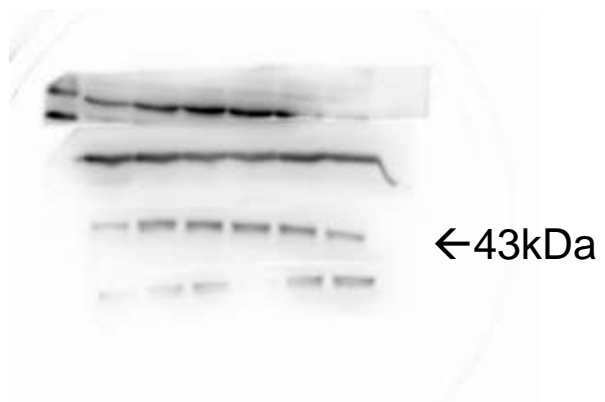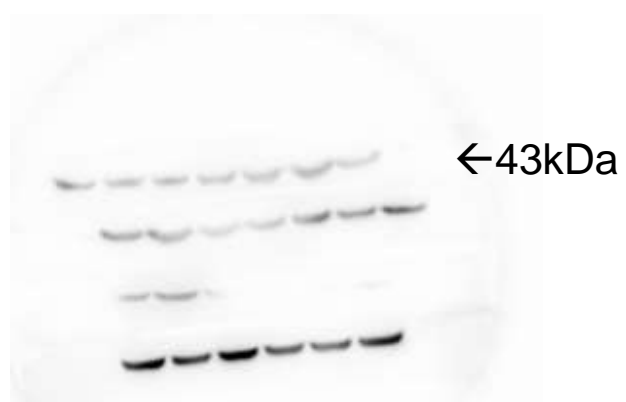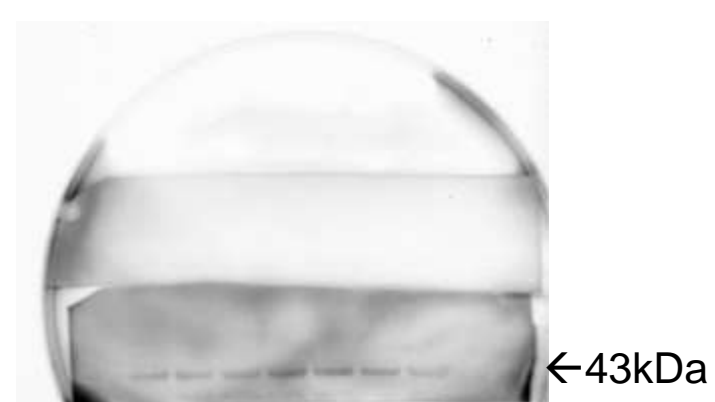

**Figure 9b Whole-cell samples**

**occludin**

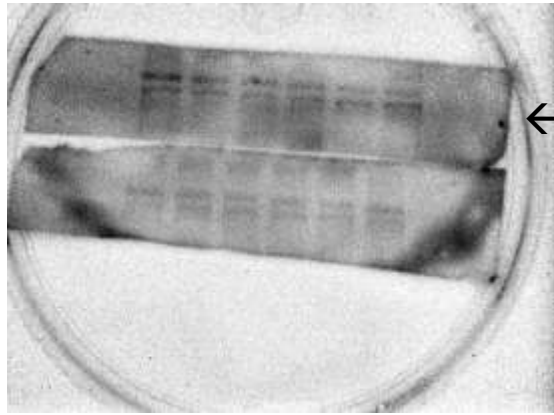

←59kDa

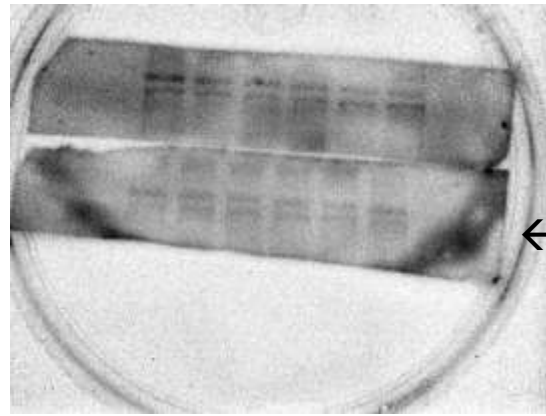

←59kDa

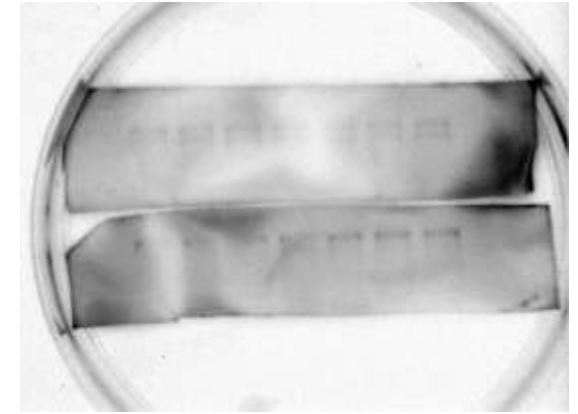

←59kDa

**Claudin-5**

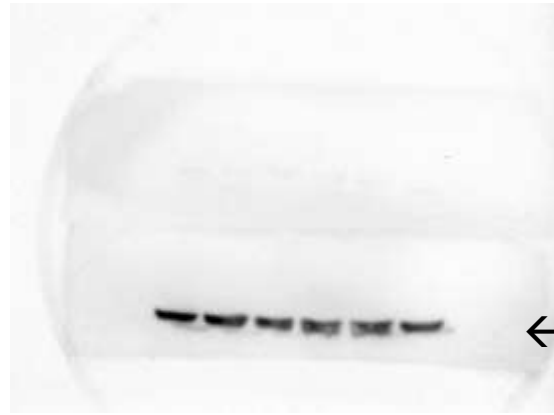

←23kDa

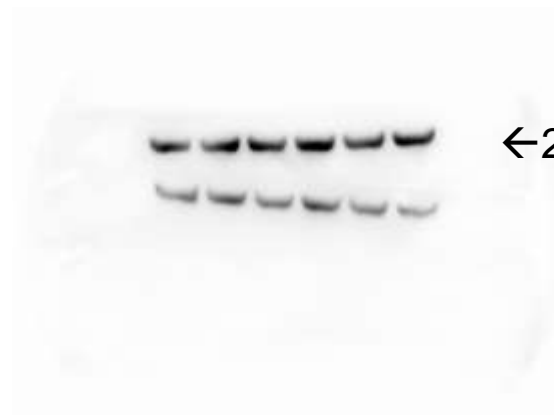

←23kDa

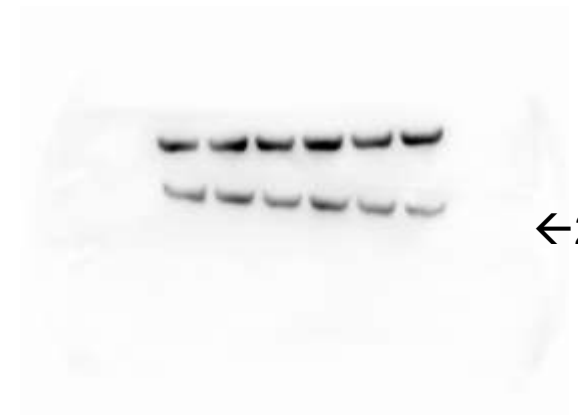

←23kDa

**VE-Cadherin**

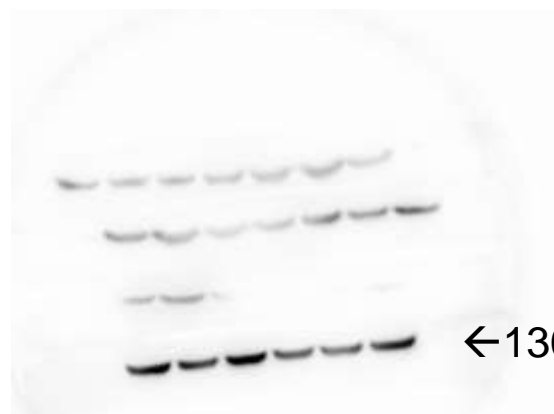

←130kDa

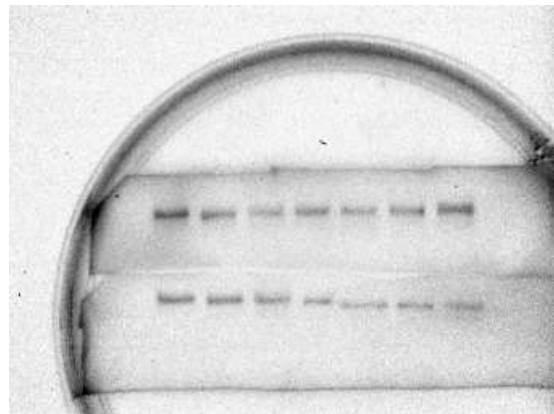

←130kDa

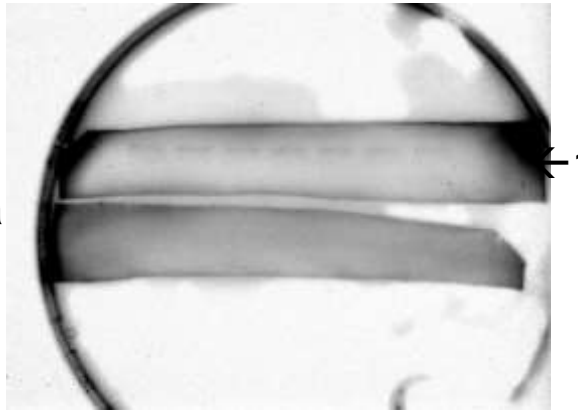

←130kDa

# Membrane samples

**occludin**

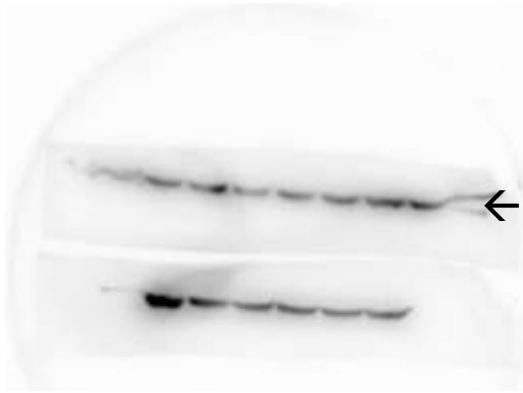

←59kDa

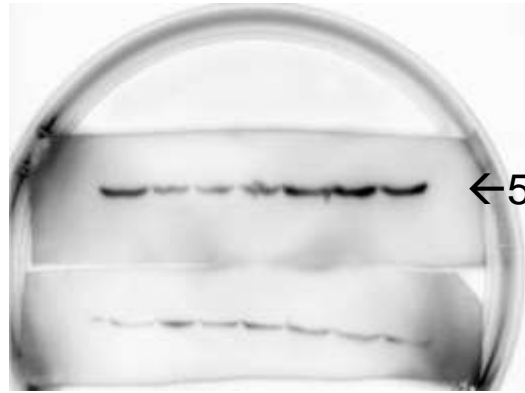

←59kDa

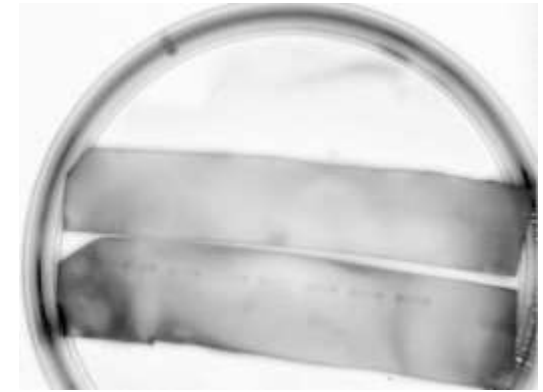

←59kDa

**Claudin-5**

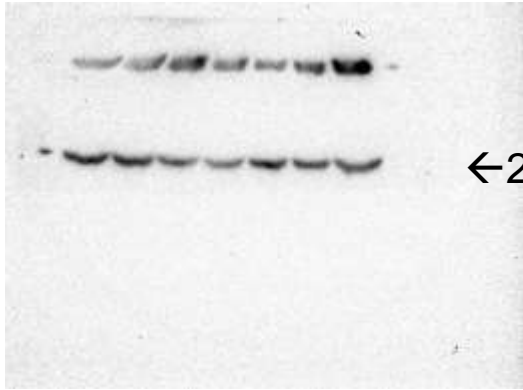

←23kDa

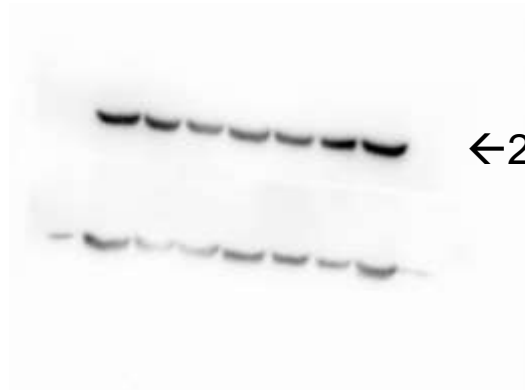

←23kDa

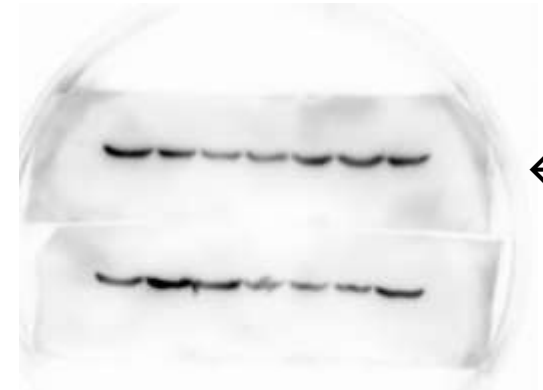

←23kDa

**VE-Cadherin**

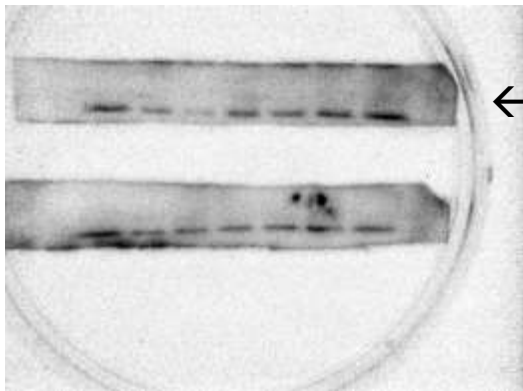

←130kDa

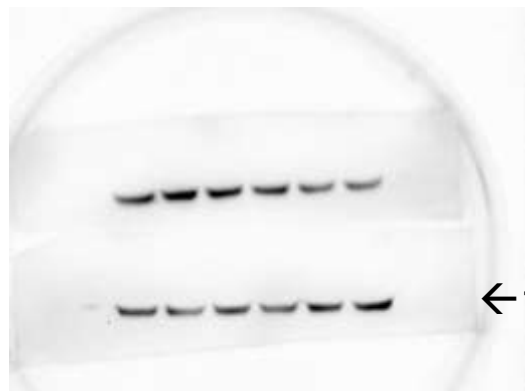

←130kDa

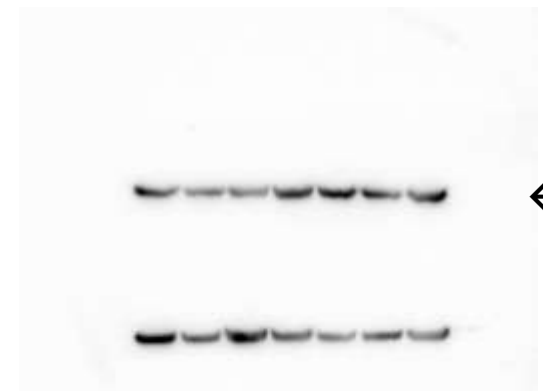

←130kDa

# ACF samples

**occludin**

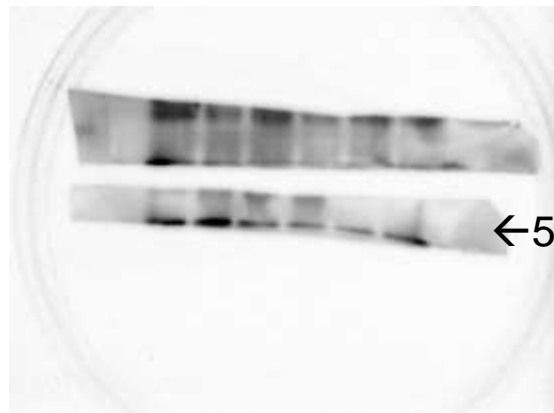

←59kDa

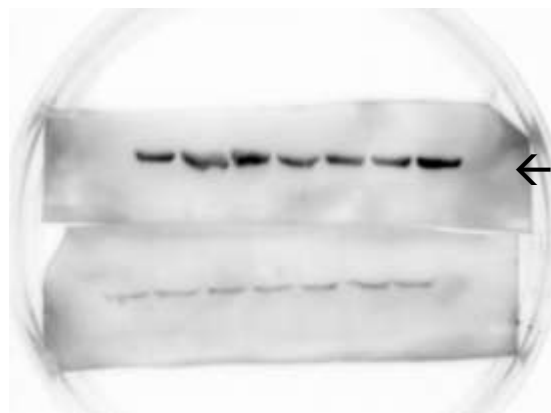

←59kDa

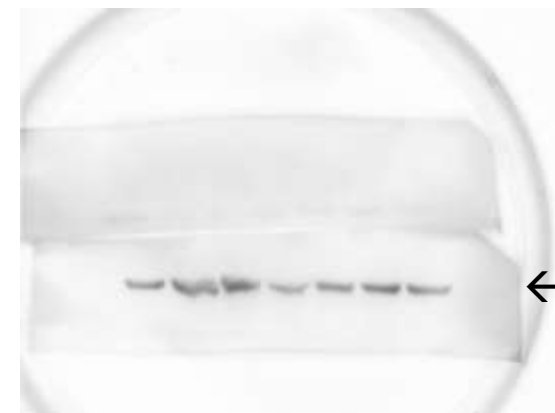

←59kDa

**Claudin-5**

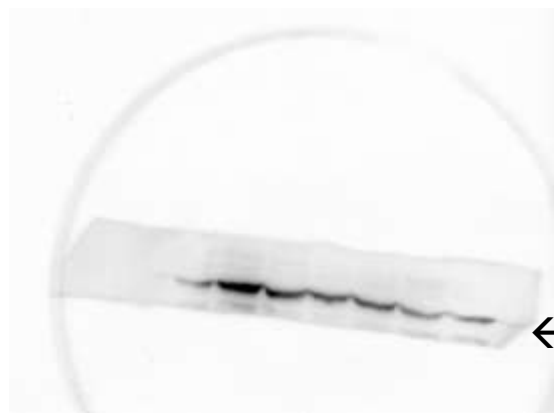

←23kDa

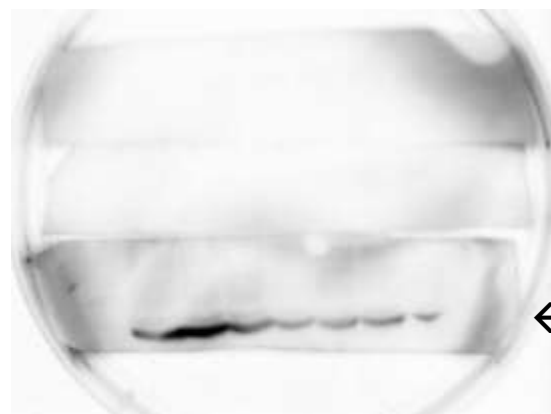

←23kDa

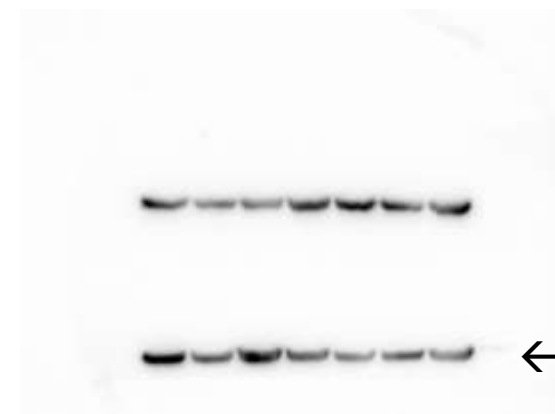

←23kDa

**VE-Cadherin**

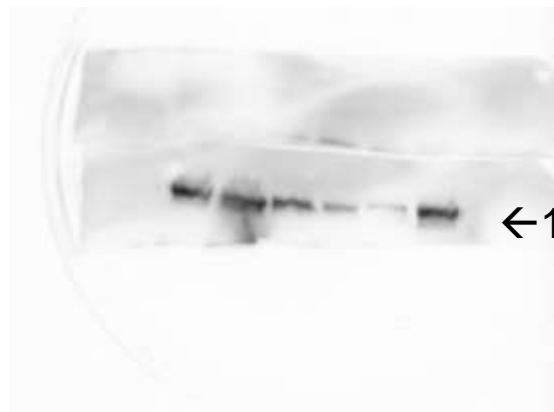

←130kDa

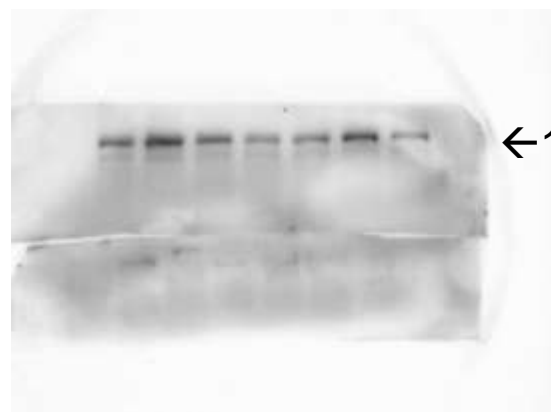

←130kDa

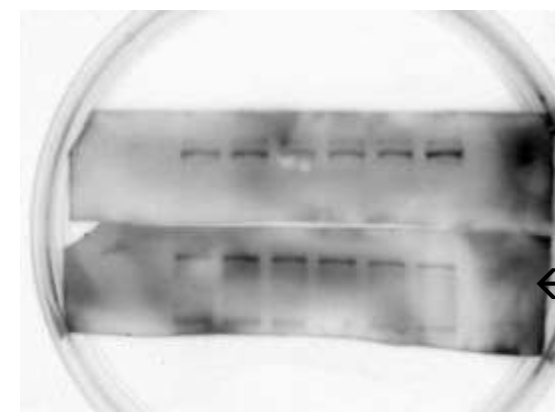

←130kDa

**$\beta$ -Actin**

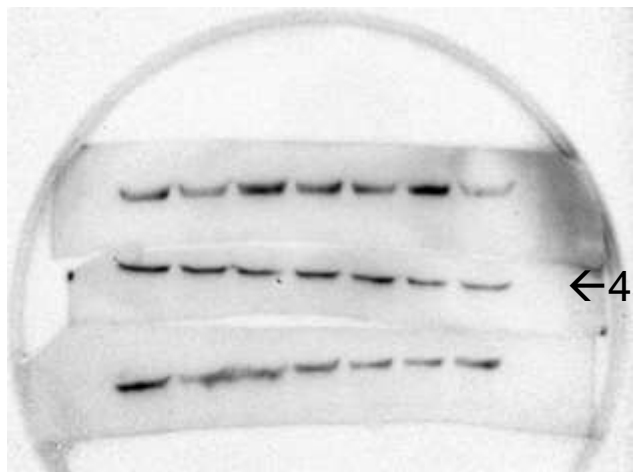

$\leftarrow 43\text{kDa}$

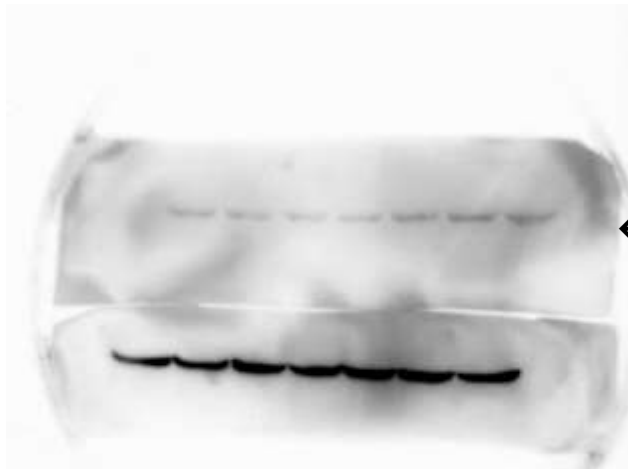

$\leftarrow 43\text{kDa}$

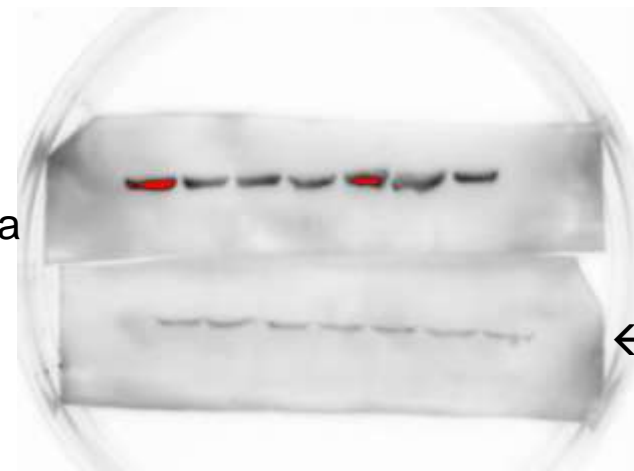

$\leftarrow 43\text{kDa}$

**$\beta$ -Tubulin**

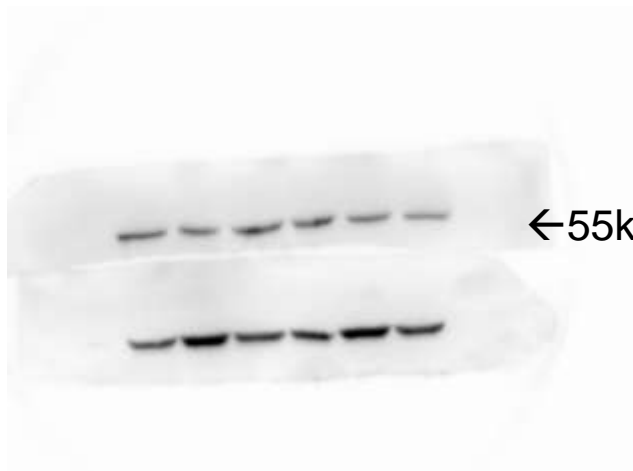

$\leftarrow 55\text{kDa}$

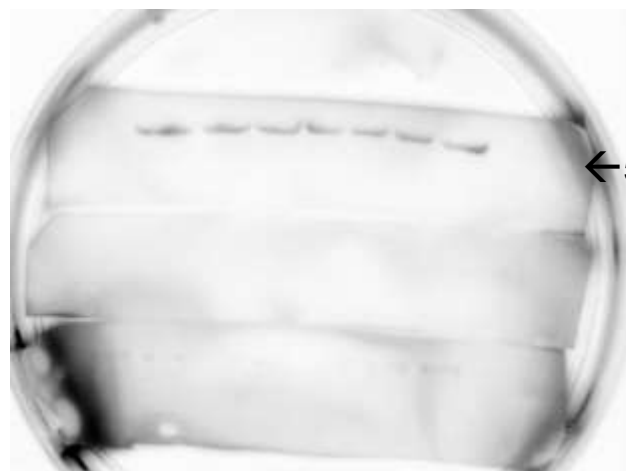

$\leftarrow 55\text{kDa}$

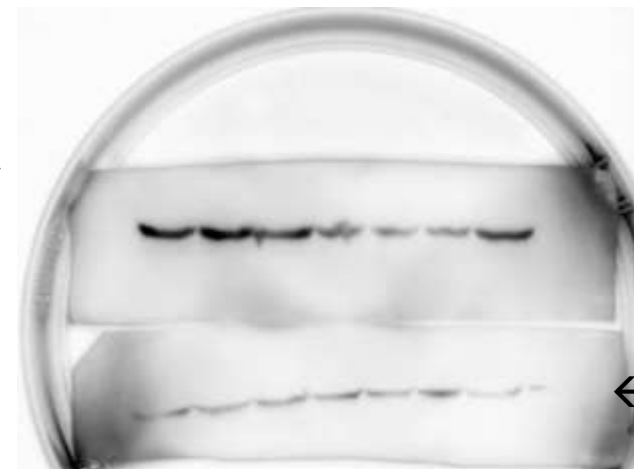

$\leftarrow 55\text{kDa}$



**Figure 10a**

**ZO-1**

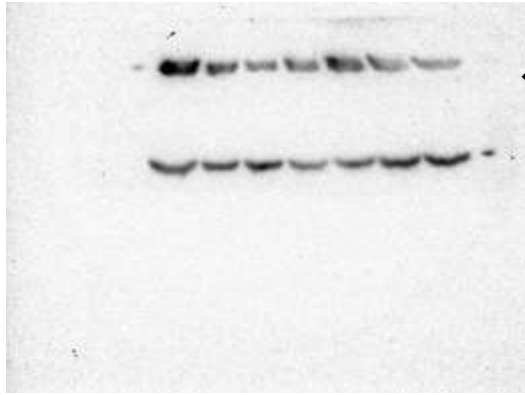

←230kDa

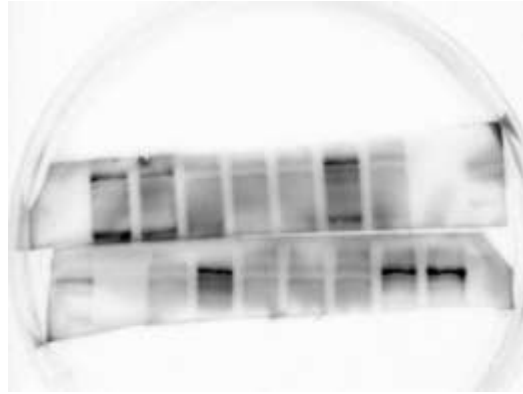

←230kDa

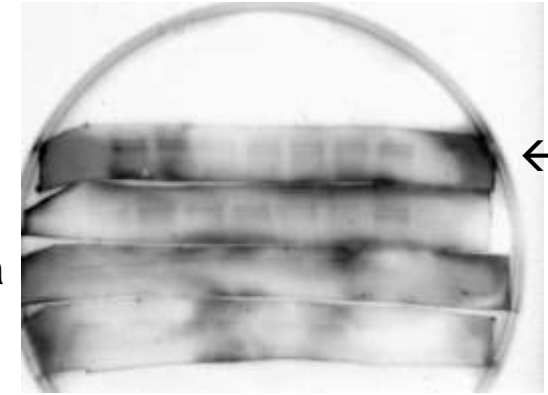

←230kDa

**occludin**

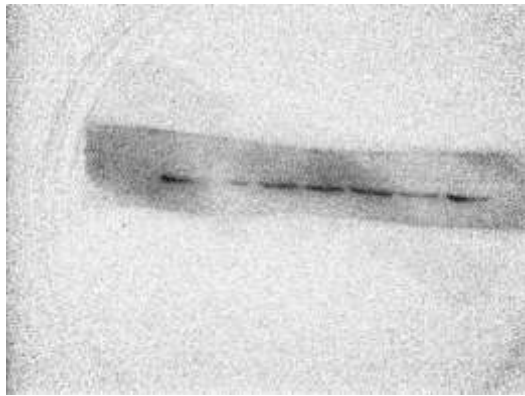

←59kDa

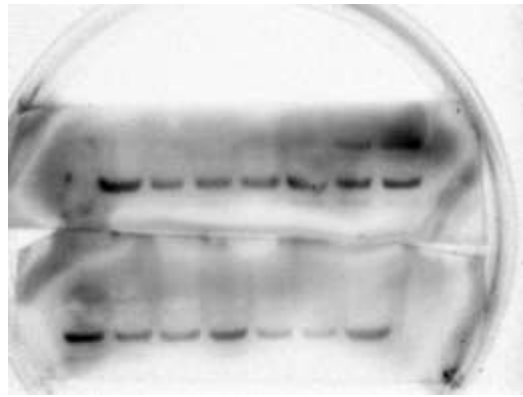

←59kDa

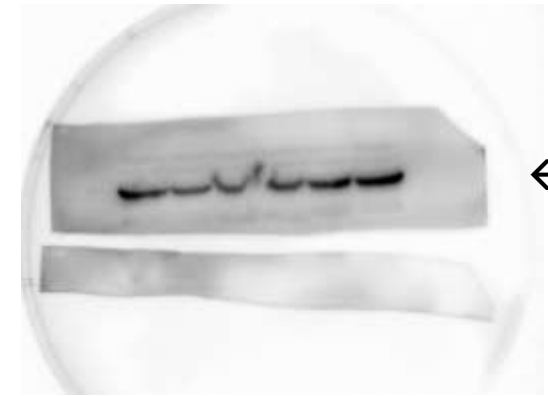

←59kDa

**Claudin-5**

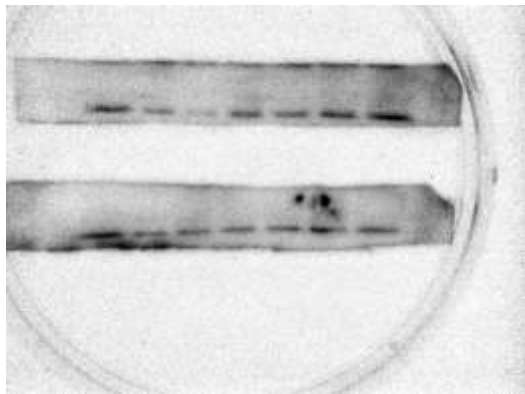

←23kDa

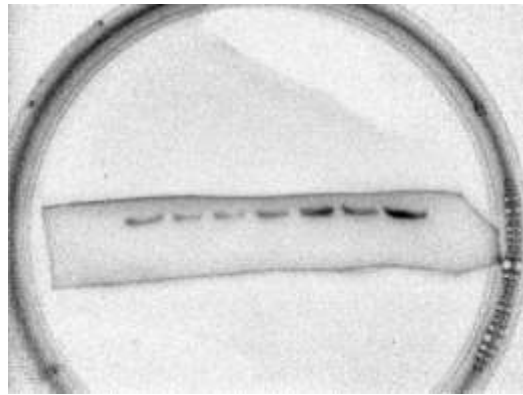

←23kDa

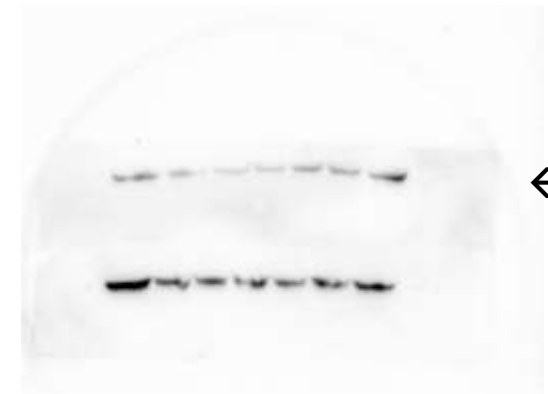

←23kDa

**BM-laminin**

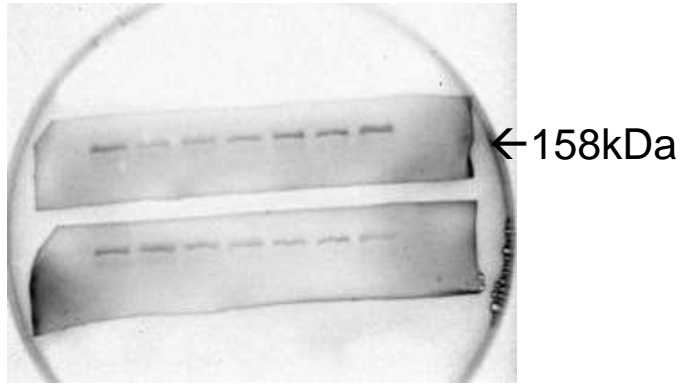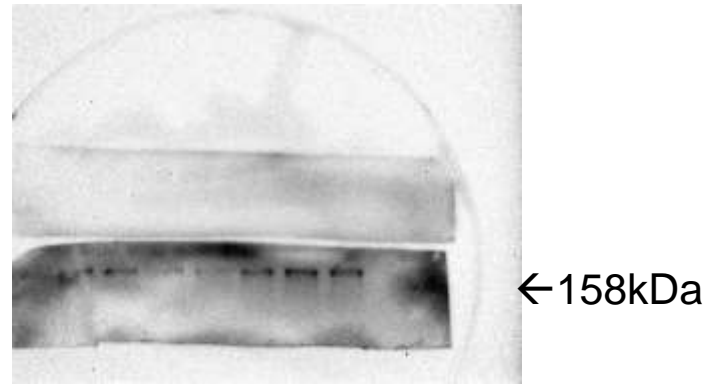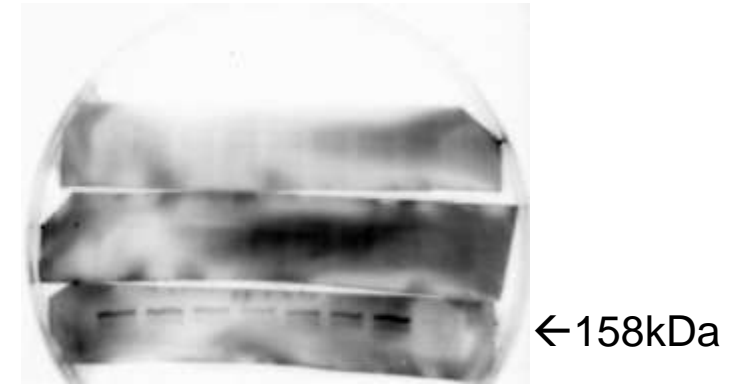

**VE-Cadherin**

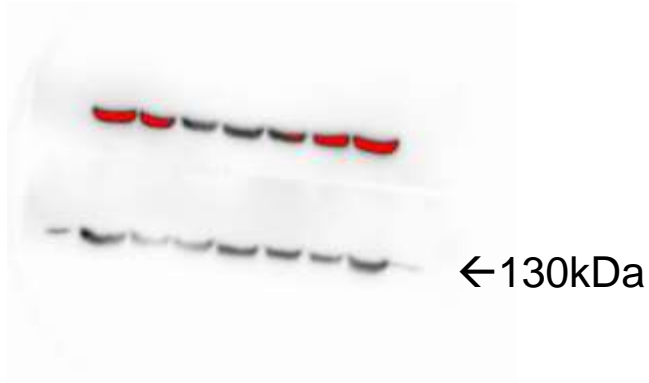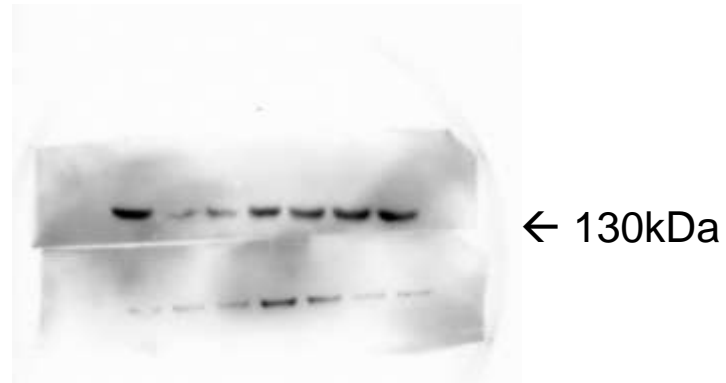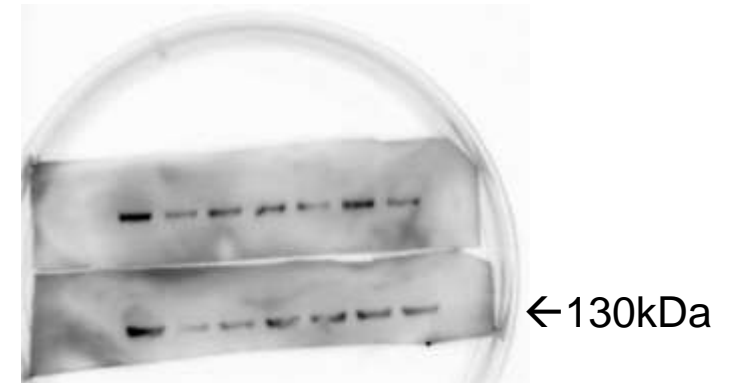

**$\beta$ -Actin**

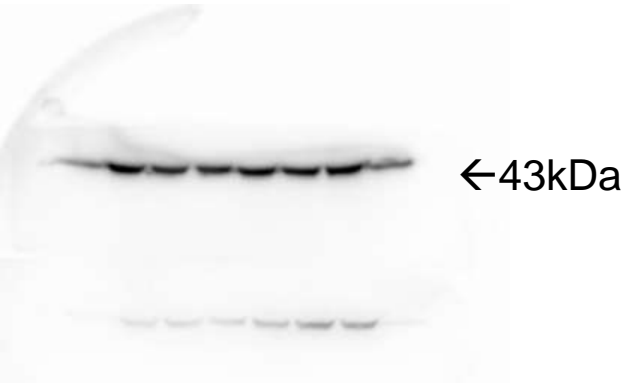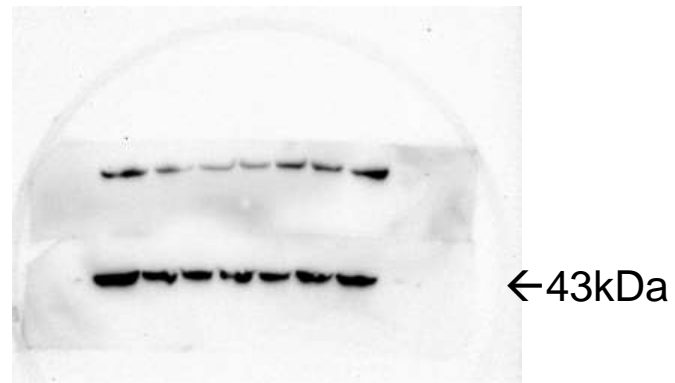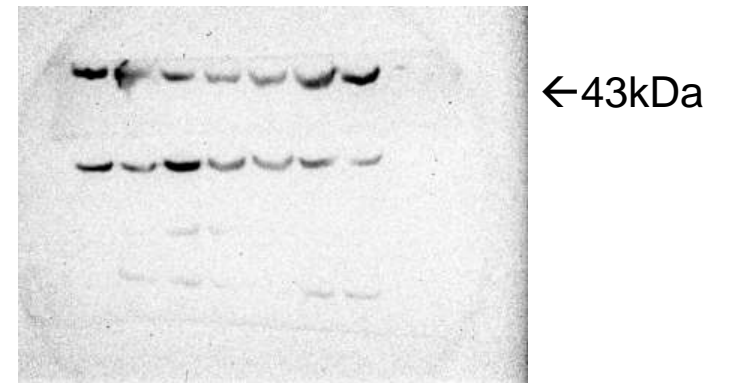

**Figure 10g**

**MMP-9**

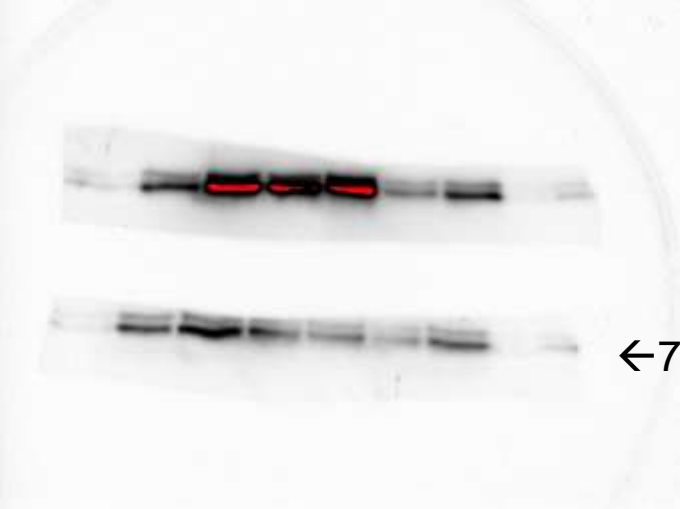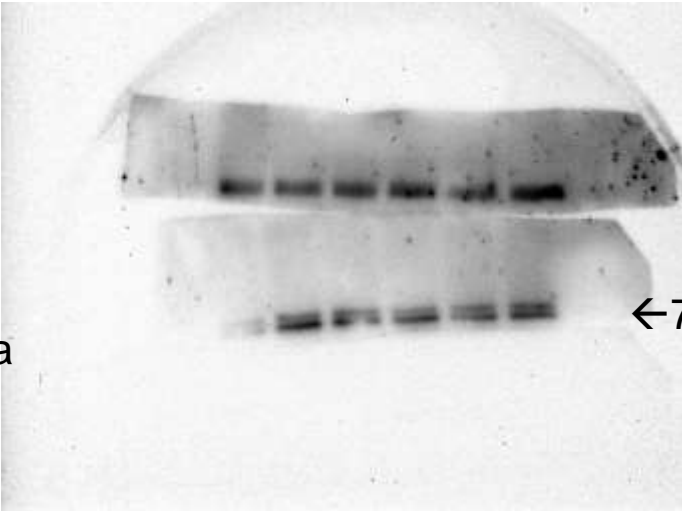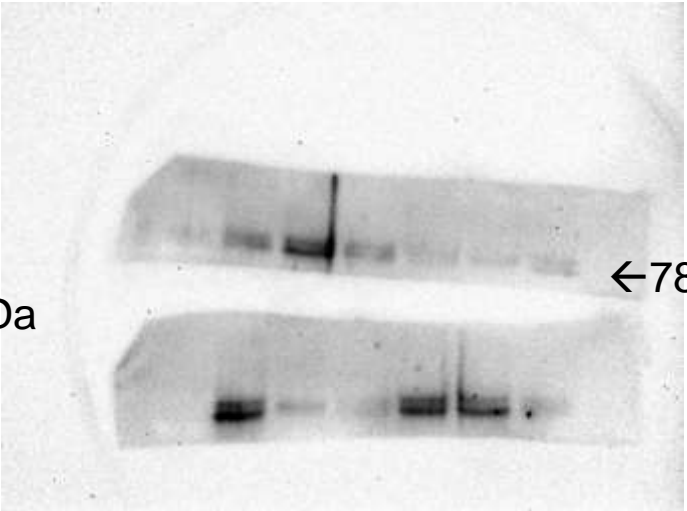

**c-Met**

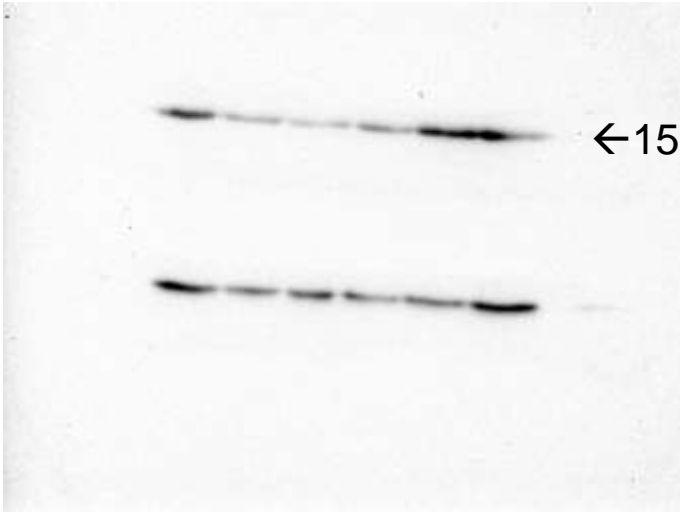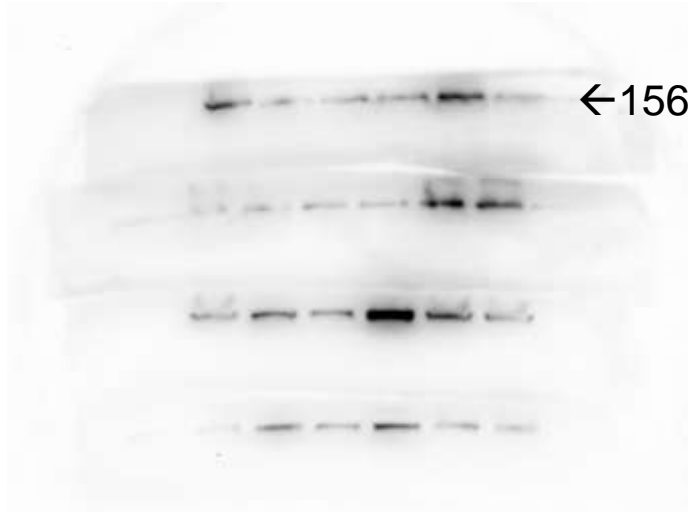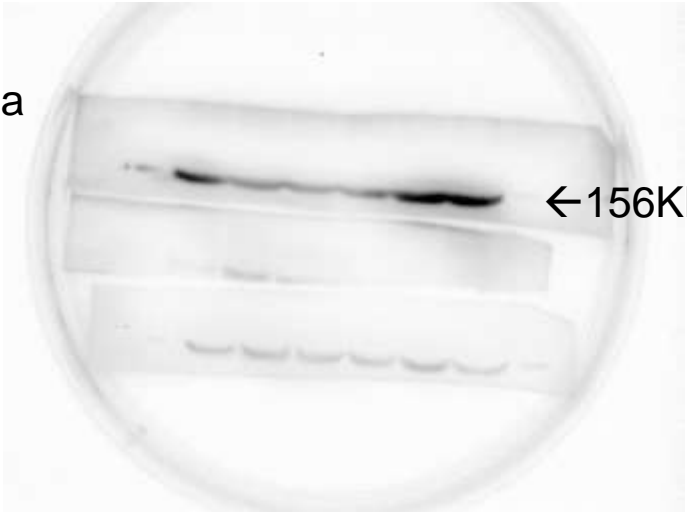

**c-Jun**

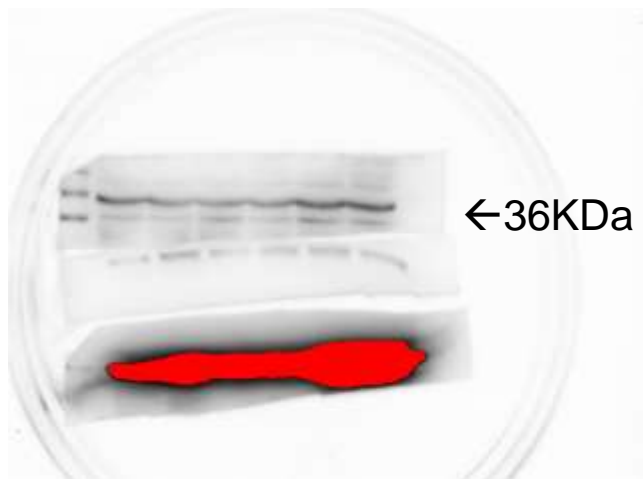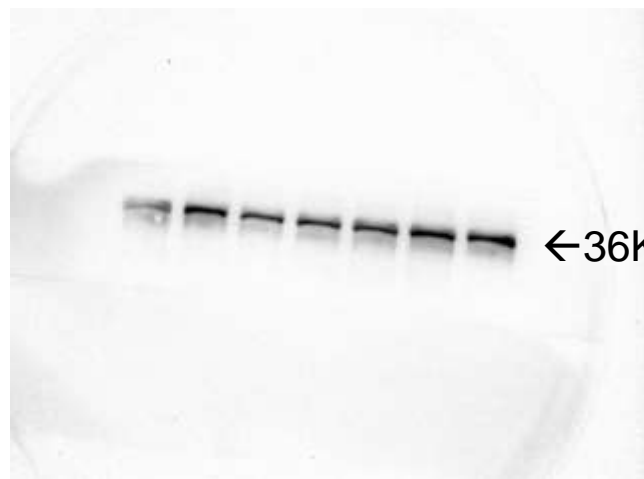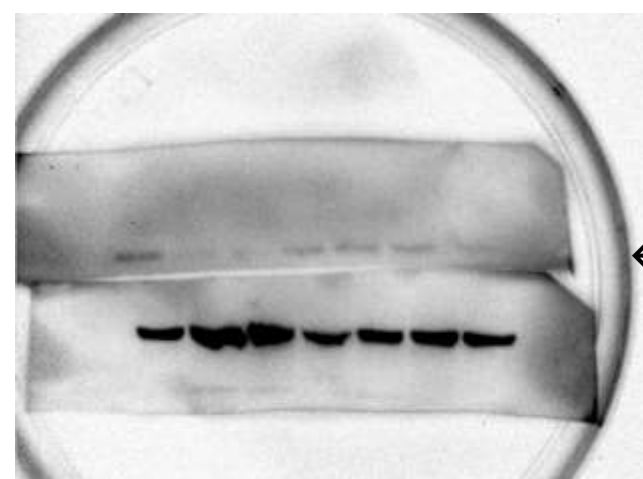

**c-Myc**

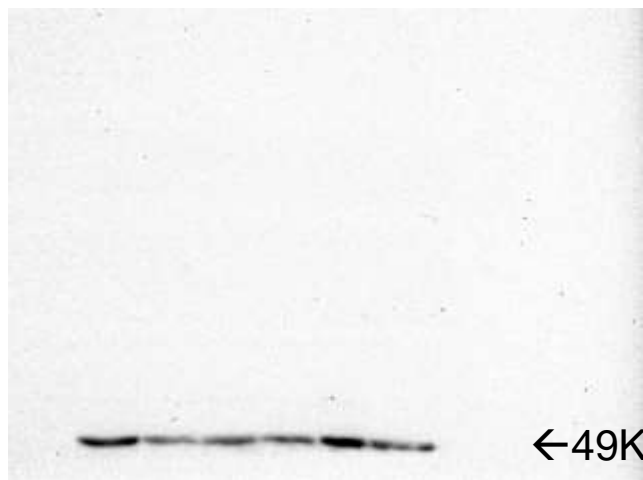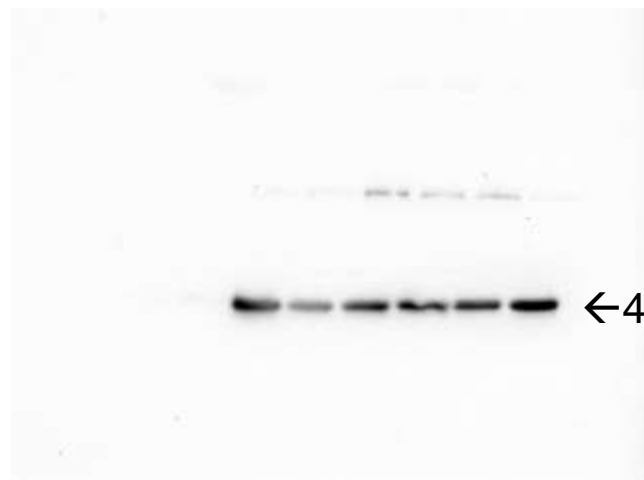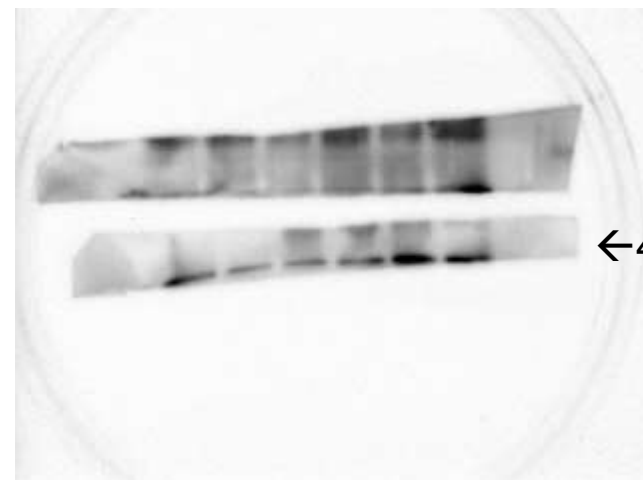

**$\beta$ -Actin**

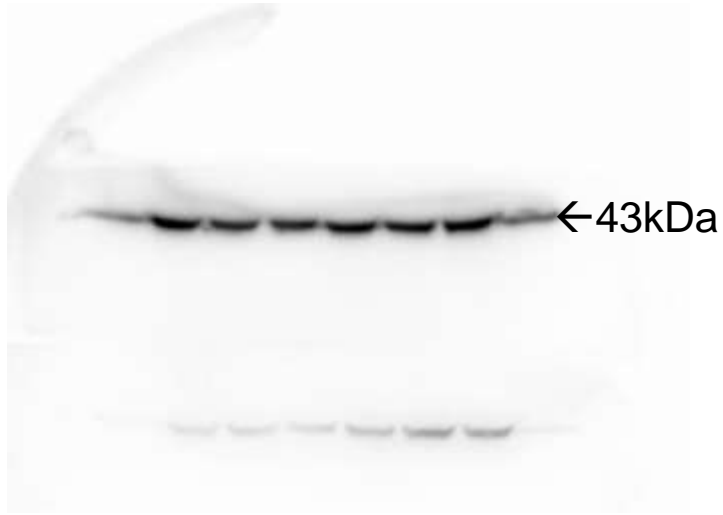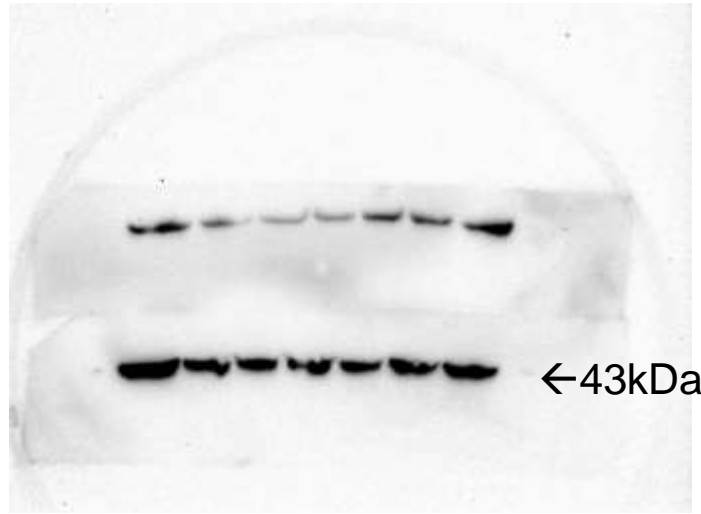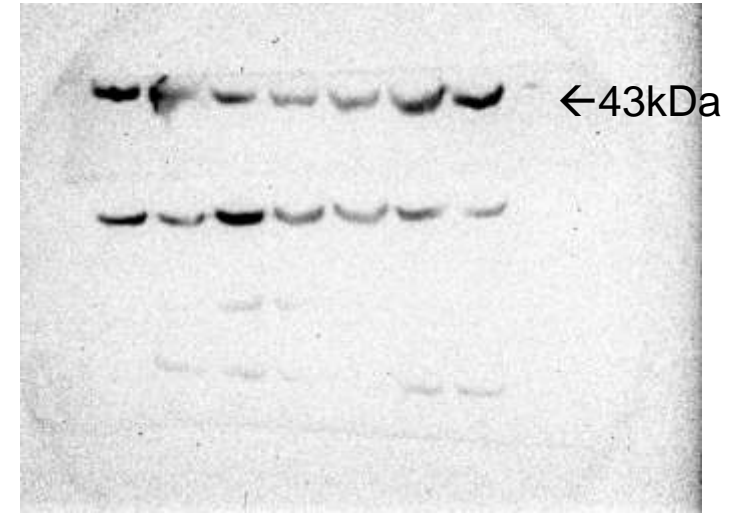

**$\beta$ -Tubulin**

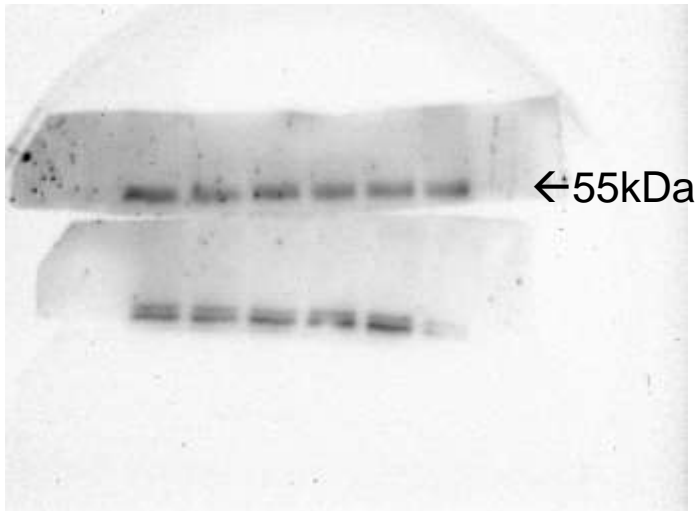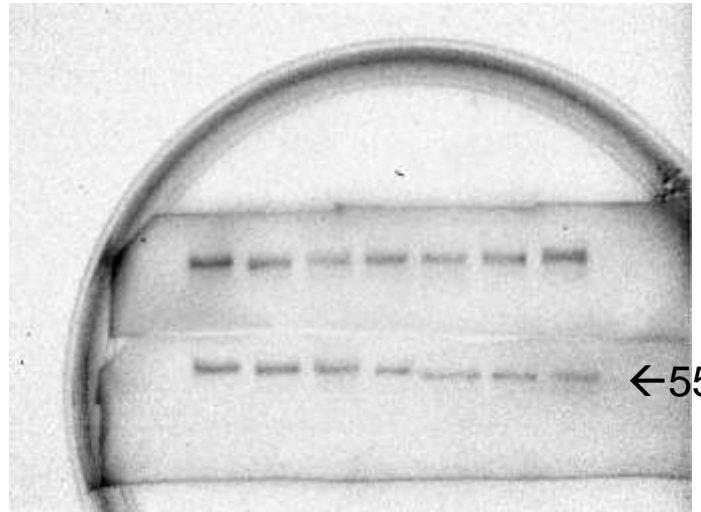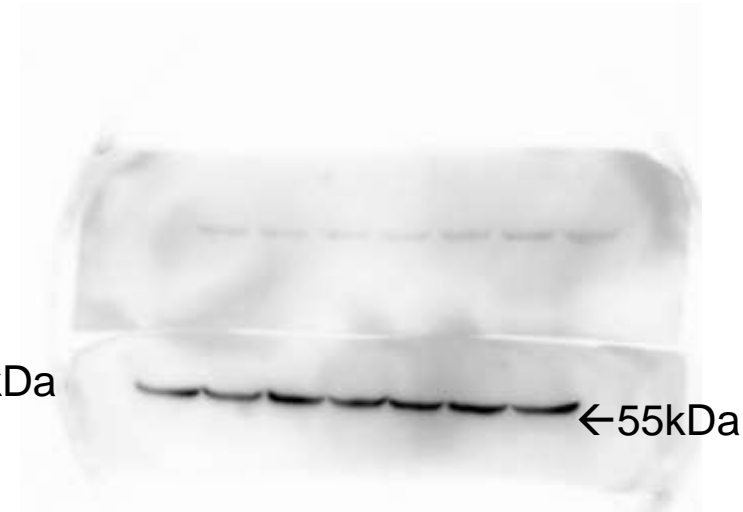

**Figure 5c**

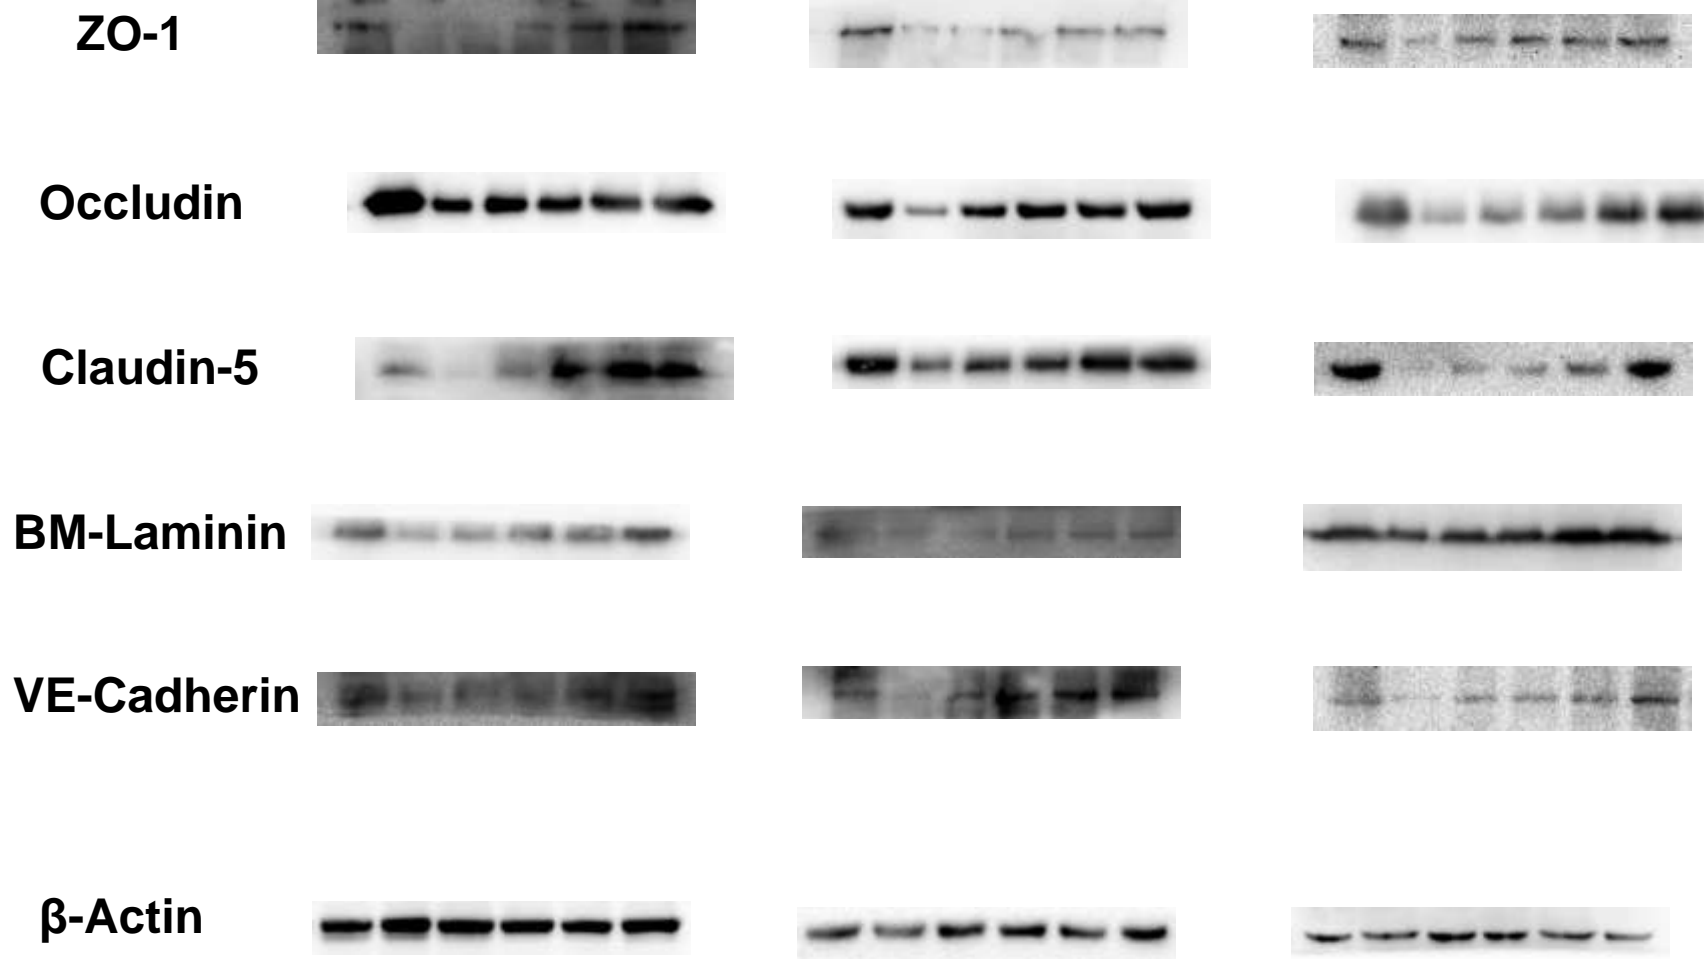

**Figure 11a**

**ZO-1**

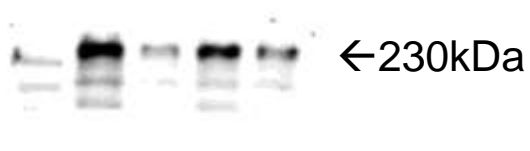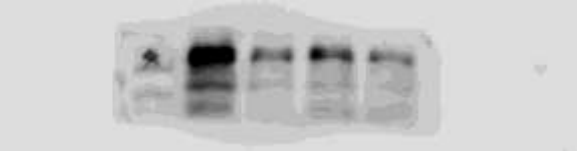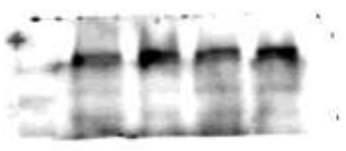

**Occludin**

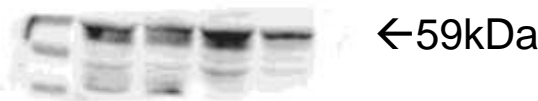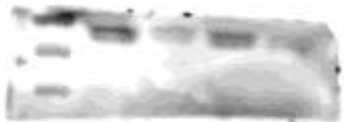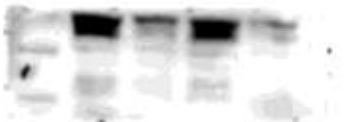

**Claudin-5**

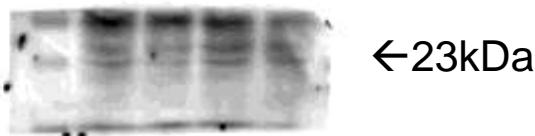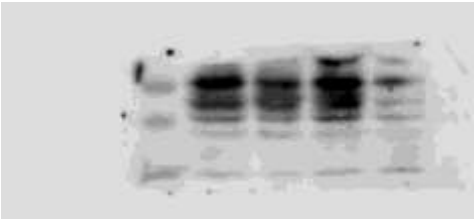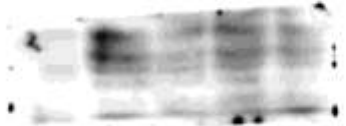

**BM-Laminin**

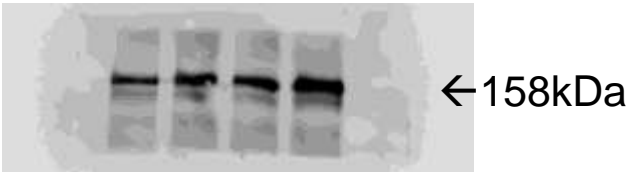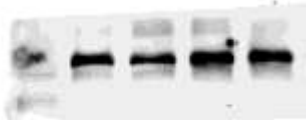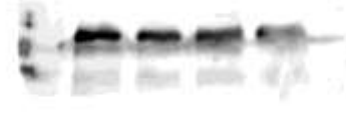

**VE-Cadherin**

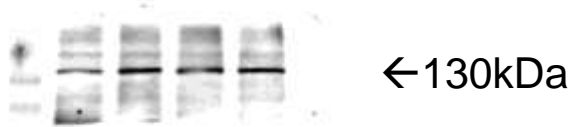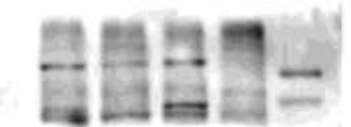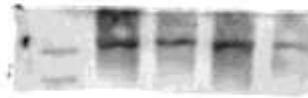

**Figure 11c**

**MMP-9**

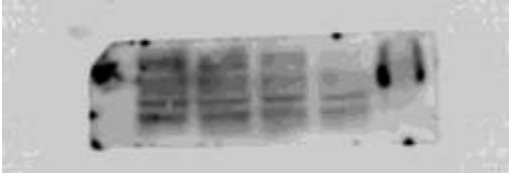

←78KDa

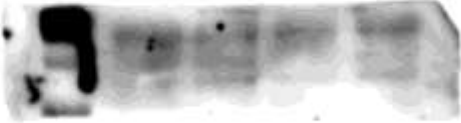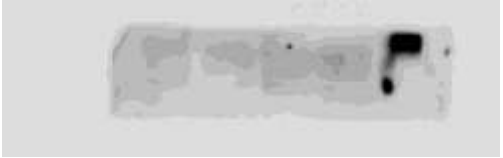

**C-met**

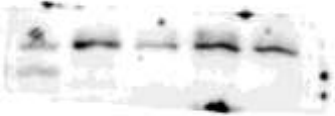

←156KDa

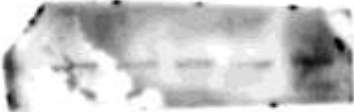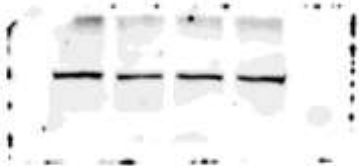

**C-jun**

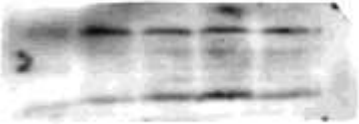

←36KDa

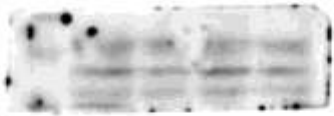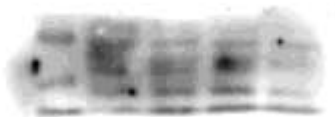

**C-myc**

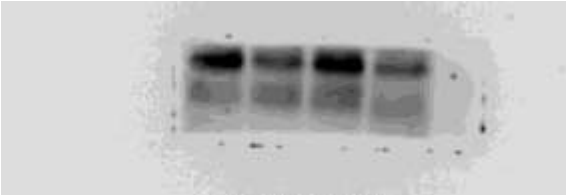

←49KDa

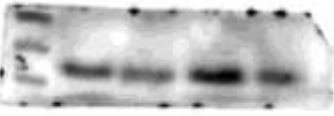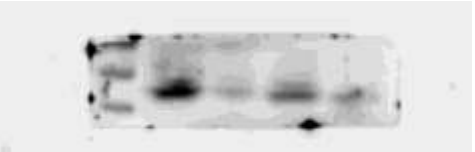

**β-Actin**

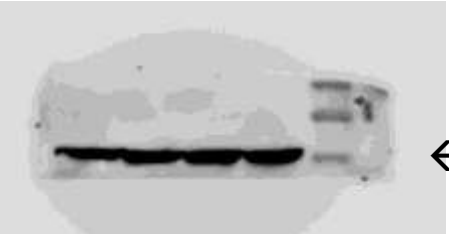

←43kDa

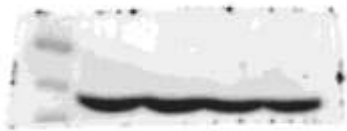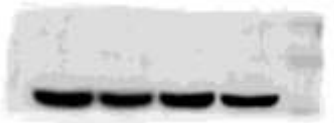

Supplement: d3fo02639f1.pdf [file d3fo02639f1.pdf]
